# Supplementary material
Source: PubMed Central journal article supplement (PMC2766352)
Supplement: NIHMS21154-supplement-01.pdf [file NIHMS21154-supplement-01.pdf]

**Table IV. Risk of short stature (adult height SDS < -2) among survivors treated with chemotherapy alone.**

| Exposure                                  | OR* | 95% CI   | Trend, p-value |
|-------------------------------------------|-----|----------|----------------|
| <b>Anthracycline, mg/m<sup>2</sup></b>    |     |          |                |
| 0                                         | 1.0 | referent |                |
| 1-100                                     | 0.9 | 0.2, 4.4 |                |
| 101-300                                   | 0.9 | 0.1, 7.6 |                |
| >300                                      | 0.7 | 0.1, 3.2 | 0.63           |
| <b>Cyclophosphamide, mg/m<sup>2</sup></b> |     |          |                |
| 0                                         | 1.0 | referent |                |
| 1-2000                                    | 1.2 | 0.4, 3.9 |                |
| 2001-5000                                 | 1.7 | 0.4, 6.6 |                |
| >5000                                     | 0.7 | 0.1, 3.3 | 0.91           |
| <b>Cytarabine, mg/m<sup>2</sup></b>       |     |          |                |
| 0                                         | 1.0 | referent |                |
| 1-2000                                    | 0.9 | 0.2, 4.0 |                |
| 2001-8000                                 | 0.5 | 0.1, 4.2 |                |
| >8000                                     | 0.4 | 0.1, 3.5 | 0.34           |
| <b>Cytarabine-intrathecal, mg</b>         |     |          |                |
| 0                                         | 1.0 | referent |                |
| 1-250                                     | 0.6 | 0.1, 2.9 |                |
| 251-500                                   | 0.5 | 0.1, 2.1 |                |
| >500                                      | 1.1 | 0.3, 4.2 | 0.64           |

Epipodophyllotoxin, mg/m<sup>2</sup>

0 1.0 referent

Any 0 0, -<sup>†</sup>

Methotrexate-intrathecal, mg

1-150 1.0 referent

151-200 0.3 0.1, 1.0

>200 0.6 0.2, 1.8 0.24

Treatment intensity score<sup>‡</sup>

Low 1.0 referent

Medium 0.3 0.1, 1.2

High 0.6 0.2, 1.9 0.35

Treatment duration, years

<2.5 1.0 referent

2.5-3.5 1.2 0.4, 3.4

>3.5 1.7 0.3, 9.1 0.56

---

\* Adjusted for sex, age at diagnosis, and ethnicity

<sup>†</sup> No observations with height SDS < -2

<sup>‡</sup> Tertiles, based on the cumulative number of drugs received as well as their dose category (none, low, medium, or high) if known

## APPENDIX. CCSS Institutions and Investigators

University of California-San Francisco, CA  
 University of Alabama, Birmingham, AL  
 International Epidemiology Institute, Rockville, MD  
 University of Washington, Seattle, WA  
 UT-Southwestern Medical Center at Dallas, TX  
 Cincinnati Children's Hospital Medical Center  
 Dana-Farber Cancer Institute, Boston, MA

Texas Children's Center, Houston, TX  
 Children's Hospital and Medical Center, Seattle, WA

Roswell Park Cancer Institute, Buffalo, NY  
 Hospital for Sick Children, Toronto, ON  
 St. Louis Children's Hospital, MO  
 St. Jude Children's Research Hospital, Memphis, TN

University of Michigan, Ann Arbor, MI  
 Stanford University School of Medicine, Stanford, CA

Emory University, Atlanta, GA  
 Children's Hospital of Philadelphia, PA  
 Children's Hospital, Oklahoma City, OK  
 Children's Hospital, Denver, CO  
 Children's Hospitals and Clinics of Minnesota  
 Columbus Children's Hospital, OH

Children's National Medical Center, Washington, DC  
 Children's Hospital of Pittsburgh, PA  
 University of Minnesota, Minneapolis, MN

Children's Hospital Los Angeles, CA  
 Memorial Sloan-Kettering Cancer Center New York  
 National Cancer Institute, Bethesda, MD  
 Mayo Clinic, Rochester, MN

U.T.M.D. Anderson Cancer Center, Houston, TX  
 Riley Hospital for Children, Indianapolis, IN  
 Fred Hutchinson Cancer Research Center, Seattle, WA

University of Alberta, Edmonton, AB  
 University of California-Los Angeles, CA

Robert Goldsby, M.D.\* , Arthur Ablin, M.D. †  
 Roger Berkow, M.D.\*  
 John Boice, Sc.D. ‡  
 Norman Breslow, Ph.D. ‡  
 Gail Tomlinson, M.D.\* , Geroge R. Buchanan, M.D. †  
 Stella Davies, M.D., Ph.D. ‡  
 Lisa Diller, M.D.\* , Holcombe Grier, M.D. †,  
 Frederick Li, M.D. ‡  
 Zoann Dreyer, M.D.\*  
 Debra Friedman, M.D., MPH\*, Thomas  
 Pendergrass, M.D. †  
 Daniel M. Green, M.D.\* ‡  
 Mark Greenberg, MB, ChB\*  
 Robert Hayashi, M.D.\* , Teresa Vietti, M.D. †  
 Leslie L. Robison, Ph.D.\* ‡,  
 Melissa Hudson, M.D.\* ‡  
 Raymond Hutchinson, M.D.\*  
 Neyssa Marina, M.D.\* , Michael P. Link, M.D. †,  
 Sarah S. Donaldson, M.D. ‡  
 Lillian Meacham, M.D.\*  
 Anna Meadows, M.D.\* ‡, Bobbie Bayton ‡  
 John Mulvihill, M.D. ‡  
 Brian Greffe, M.D.\* , Lorrie Odom, M.D. †  
 Joanna Perkins, M.D.\* , Maura O'Leary, M.D. †  
 Amanda Termuhlen, M.D.\* , Frederick Ruymann,  
 M.D. †, Stephen Qualman, M.D. ‡  
 Gregory Reaman, M.D.\* , Roger Packer, M.D. ‡  
 A. Kim Ritchey, M.D.\* , Julie Blatt, M.D. †  
 Ann Mertens, Ph.D.\* ‡, Joseph Neglia, M.D., MPH ‡,  
 Mark Nesbit, MD ‡  
 Kathy Ruccione, RN, MPH\*  
 Charles Sklar, M.D.\* ‡, Kevin Oeffinger, M.D. ‡  
 Barry Anderson, M.D. ‡, Peter Inskip, Sc.D. ‡  
 Vilmarie Rodriguez, M.D.\* , W. Anthony  
 Smithson, M.D., Gerald Gilchrist, M.D. †  
 Louise Strong, M.D.\* ‡, Marilyn Stovall, Ph.D. ‡  
 Terry A. Vik, M.D.\* , Robert Weetman, M.D. †  
 Wendy Leisenring, Sc.D.\* ‡, John Potter, M.D.,  
 Ph.D. † ‡  
 Yutaka Yasui, Ph.D.\* ‡,  
 Lonnie Zeltzer, M.D.\* ‡

\* Institutional Principal Investigator

† Former Institutional Principal Investigator

‡ Member CCSS Steering Committee
